# Supplementary material
Source: publisher figshare collection journal article supplement (https://rs.figshare.com/ndownloader/files/14083199)
Supplement: Supplementary file 1 [file 14083199]

Supplement Table 3. Suhonen Jukka, Ilvonen Jaakko J., Nyman Tommi, and Sorvari Jouni. Brood parasitism in eusocial insects (Hymenoptera): role of host geographic range size and phylogeny. Philosophical Transactions B.

Wasp species, whether they are parasitized by a social parasite or not (Parasitized), and their social parasite species.

| **Species** | **Parasitized** | **Parasite species** |
| --- | --- | --- |
| *Polistes dominula* | Yes | *Polistes sulcifer,*  *Polistes atrimandibularis, Polistes semenowi* |
| *Polistes metricus* | No |  |
| *Polistes dorsalis* | No |  |
| *Polistes fuscatus* | No |  |
| *Vespula atropilosa* | No |  |
| *Vespula vidua* | Yes | *Vespula squamosa* |
| *Vespula acadica* | Yes | *Vespula austriaca* |
| *Vespula rufa* | Yes | *Vespula austriaca* |
| *Vespula consobrina* | No |  |
| *Vespula intermedia* | No |  |
| *Vespula flaviceps* | No |  |
| *Vespula germanica* | Yes | *Vespula squamosa* |
| *Vespula pensylvanica* | No |  |
| *Vespula maculifrons* | Yes | *Vespula squamosa* |
| *Vespula alascensis* | No |  |
| *Vespula flavopilosa* | Yes | *Vespula squamosa* |
| *Vespula vulgaris* | No |  |
| *Dolichovespula maculata* | No |  |
| *Dolichovespula media* | No |  |
| *Dolichovespula alpicola* | Yes | *Dolichovespula arctica* |
| *Dolichovespula norwegica* | Yes | *Dolichovespula adulterina* |
| *Dolichovespula sylvestris* | Yes | *Dolichovespula omissa* |
| *Dolichovespula arenaria* | Yes | *Dolichovespula arctica* |
| *Dolichovespula albida* | No |  |
| *Dolichovespula pacifica* | No |  |
| *Dolichovespula saxonica* | Yes | *Dolichovespula adulterina* |
| *Provespa anomala* | No |  |
| *Provespa barthelemyi* | No |  |
| *Vespa affinis* | No |  |
| *Vespa basalis* | No |  |
| *Vespa crabro* | Yes | *Vespa dybowskii* |
| *Vespa orientalis* | No |  |
| *Vespa mandarina* | No |  |
| *Vespa vivax* | No |  |
| *Vespa bicolor* | No |  |
| *Vespa simillima* | Yes | *Vespa dybowskii* |
| *Vespa velutina* | No |  |
